# Supplementary material for: Rapid Evolution of PARP Genes Suggests a Broad Role for ADP-Ribosylation in Host-Virus Conflicts
Source: PubMed Central journal article supplement (PMC4038475; doi:10.1371/journal.pgen.1004403), 2014-05-29
Supplement: pgen.1004403.s004.pdf [file pgen.1004403.s004.pdf]

**A**

|               | Branch-site<br>REL           |
|---------------|------------------------------|
| PARP1         |                              |
| PARP2         |                              |
| PARP3         |                              |
| <b>PARP4</b>  | Marmoset                     |
| PARP5a        |                              |
| PARP5b        |                              |
| <b>PARP9</b>  | Marmoset                     |
| <b>PARP14</b> |                              |
| <b>PARP15</b> |                              |
| PARP7         |                              |
| PARP12        |                              |
| <b>PARP13</b> | Marmoset<br>Gibbon<br>Rhesus |
| PARP10        |                              |
| PARP11        |                              |
| PARP6         |                              |
| PARP8         |                              |
| PARP16        |                              |

**B**

|               | Positively selected codons |       |
|---------------|----------------------------|-------|
|               | %                          | dN/dS |
| PARP1         |                            |       |
| PARP2         |                            |       |
| PARP3         |                            |       |
| <b>PARP4</b>  | 5.6                        | 6.0   |
| PARP5a        |                            |       |
| PARP5b        |                            |       |
| <b>PARP9</b>  | 7.2                        | 6.4   |
| <b>PARP14</b> | 22                         | 2.7   |
| <b>PARP15</b> | 8.8                        | 6.9   |
| PARP7         |                            |       |
| PARP12        |                            |       |
| <b>PARP13</b> | 20                         | 2.7   |
| PARP10        |                            |       |
| PARP11        |                            |       |
| PARP6         |                            |       |
| PARP8         |                            |       |
| PARP16        |                            |       |

**C**

|               | Whole gene<br>dN/dS |
|---------------|---------------------|
| PARP1         | 0.13                |
| PARP2         | 0.20                |
| PARP3         | 0.28                |
| <b>PARP4</b>  | 0.65                |
| PARP5a        | 0.04                |
| PARP5b        | 0.03                |
| <b>PARP9</b>  | 0.85                |
| <b>PARP14</b> | 0.64                |
| <b>PARP15</b> | 0.90                |
| PARP7         | 0.12                |
| PARP12        | 0.29                |
| <b>PARP13</b> | 0.71                |
| PARP10        | 0.32                |
| PARP11        | 0.12                |
| PARP6         | 0.01                |
| PARP8         | 0.07                |
| PARP16        | 0.09                |
