# Supplementary material for: Rapid Evolution of PARP Genes Suggests a Broad Role for ADP-Ribosylation in Host-Virus Conflicts
Source: PubMed Central journal article supplement (PMC4038475; doi:10.1371/journal.pgen.1004403), 2014-05-29
Supplement: pgen.1004403.s006.pdf [file pgen.1004403.s006.pdf]

# A

## Macrodomain containing proteins

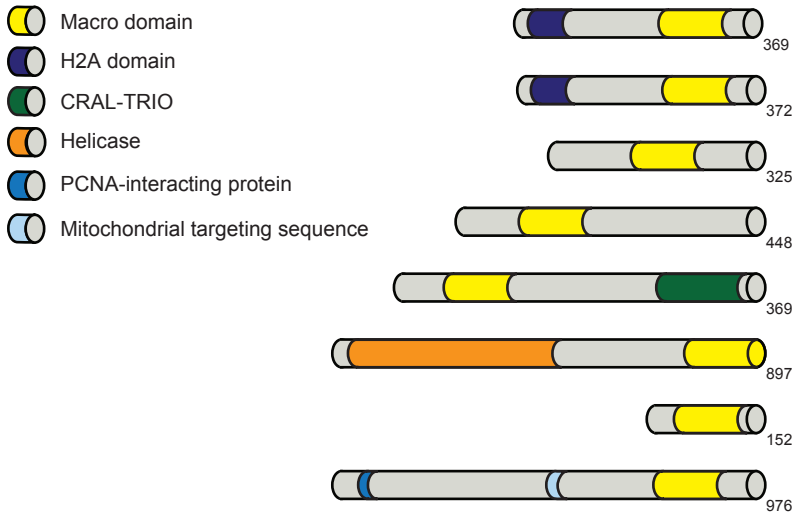

## Non-macro ADP-ribosylhydrolases

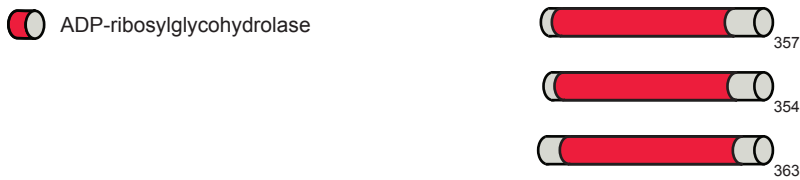

# B

| Gene name | PAML     |         | PARRIS |         |
|-----------|----------|---------|--------|---------|
|           | 2 (ln λ) | p-value | LRT    | p-value |
| MacroH2A1 | <1.0     | >0.4    | <0.01  | >0.99   |
| MacroH2A2 | <1.0     | >0.4    | <0.01  | >0.99   |
| MacroD1   | <1.0     | >0.4    | <0.01  | >0.99   |
| MacroD2   | <1.0     | >0.4    | <0.01  | >0.99   |
| MacroD2   | <1.0     | >0.4    | <0.01  | >0.99   |
| ALC       | <1.0     | >0.4    | <0.01  | >0.99   |
| C6ORF130  | <1.0     | >0.4    | <0.01  | >0.99   |
| PARG      | <1.0     | >0.4    | <0.01  | >0.99   |

|      |      |      |       |       |
|------|------|------|-------|-------|
| ARH1 | <1.0 | >0.4 | <0.01 | >0.99 |
| ARH2 | <1.0 | >0.4 | <0.01 | >0.99 |
| ARH3 | <1.0 | >0.4 | <0.01 | >0.99 |
