# Supplementary material for: Rapid Evolution of PARP Genes Suggests a Broad Role for ADP-Ribosylation in Host-Virus Conflicts
Source: PubMed Central journal article supplement (PMC4038475; doi:10.1371/journal.pgen.1004403), 2014-05-29

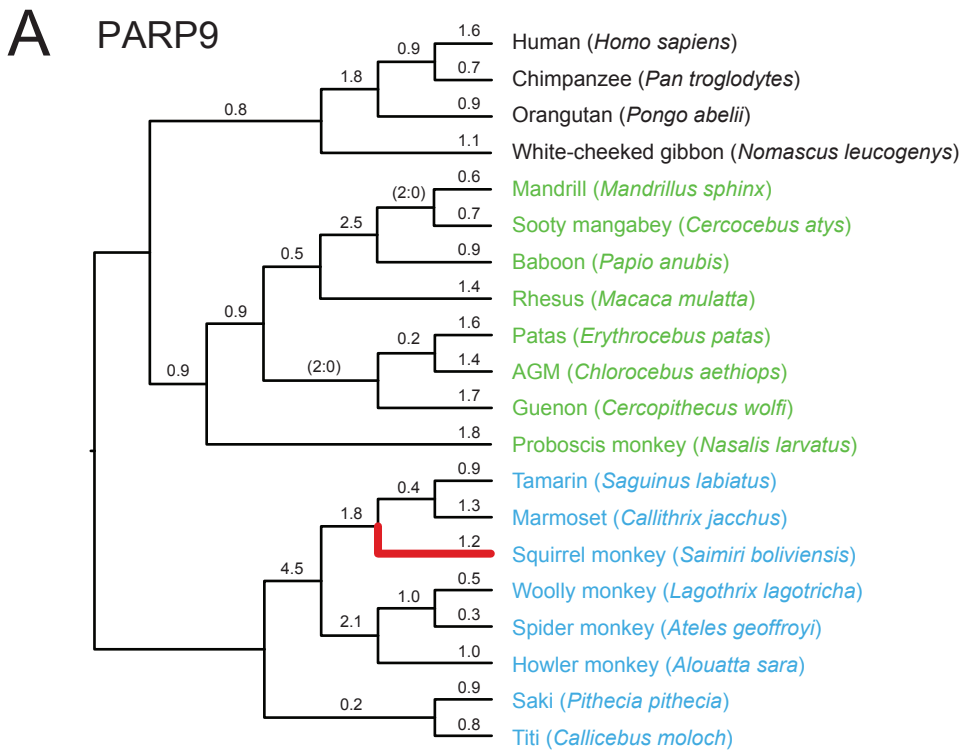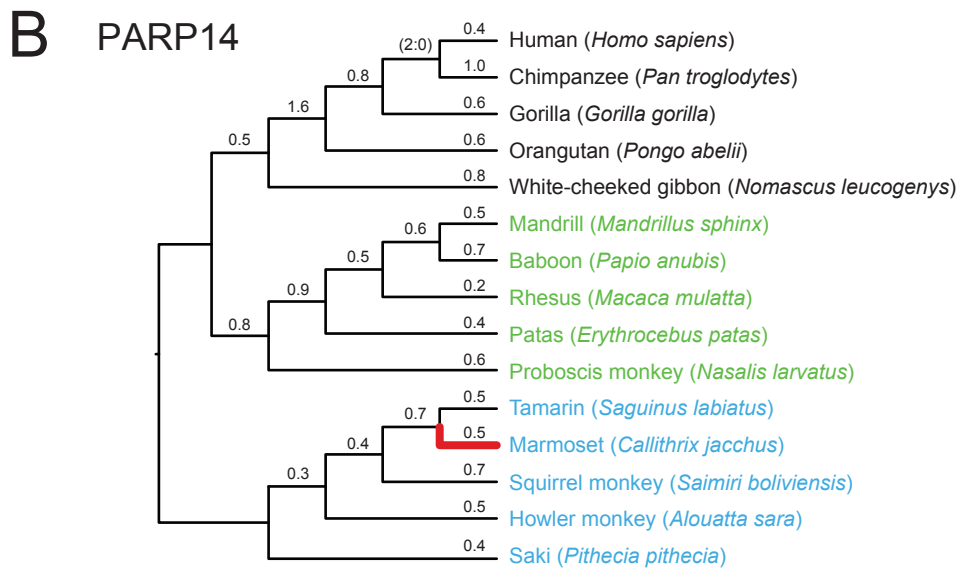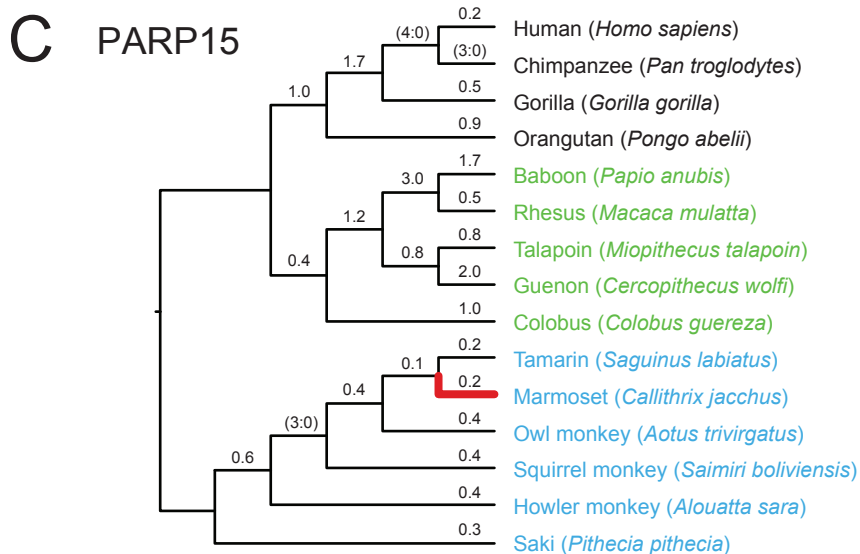

Supplement: pgen.1004403.s007.pdf [file pgen.1004403.s007.pdf]
